# Supplementary material for: A comparative study on nanocrystalline layered and crystalline cubic TiP2O7 for rechargeable Li/Na/K alkali metal batteries
Source: Royal Society of Chemistry journal article supplement (doi:10.1039/c8ta05352a), 2018-01-01
Supplement: c8ta05352a1.pdf [file c8ta05352a1.pdf]

**Supplementary Material for Journal of Materials Chemistry A**

**A comparative study on nanocrystalline layered and crystalline cubic  
 $\text{TiP}_2\text{O}_7$  for rechargeable Li/Na/K alkali metal batteries**

Qiao Hu, Jia-Yun Liang, Jia-Ying Liao, Zhong-Feng Tang, Xiang Ding, Chun-Hua

Chen\*

*CAS Key Laboratory of Materials for Energy Conversions, Department of Materials  
Science and Engineering & Collaborative Innovation Center of Suzhou Nano Science  
and Technology, University of Science and Technology of China, Anhui Hefei 230026,  
China*

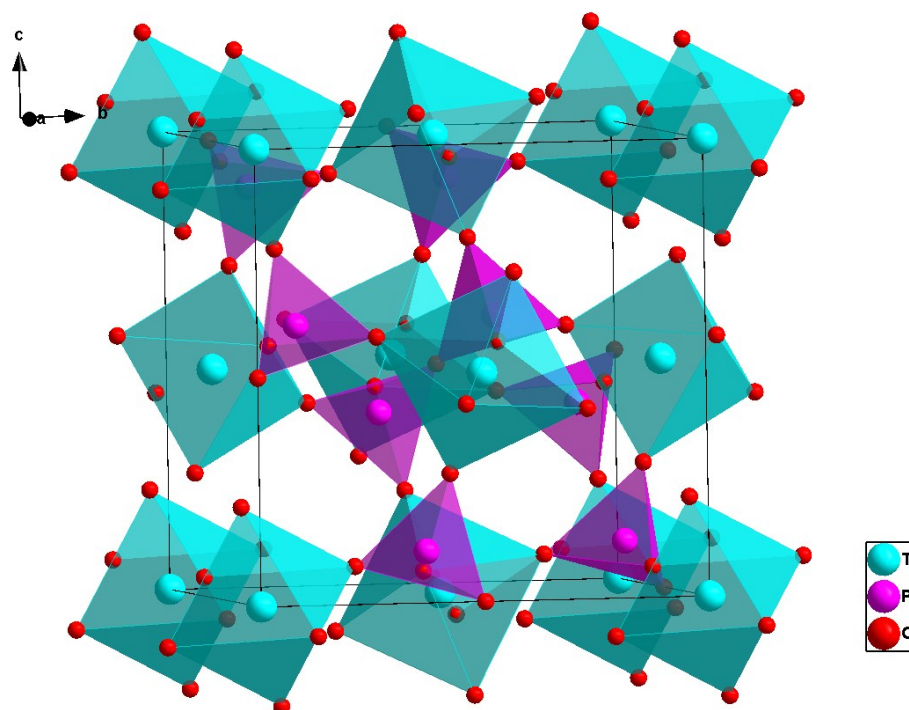

Fig. S1 Schematic illustration of the unit cell of cubic- $\text{TiP}_2\text{O}_7$ .

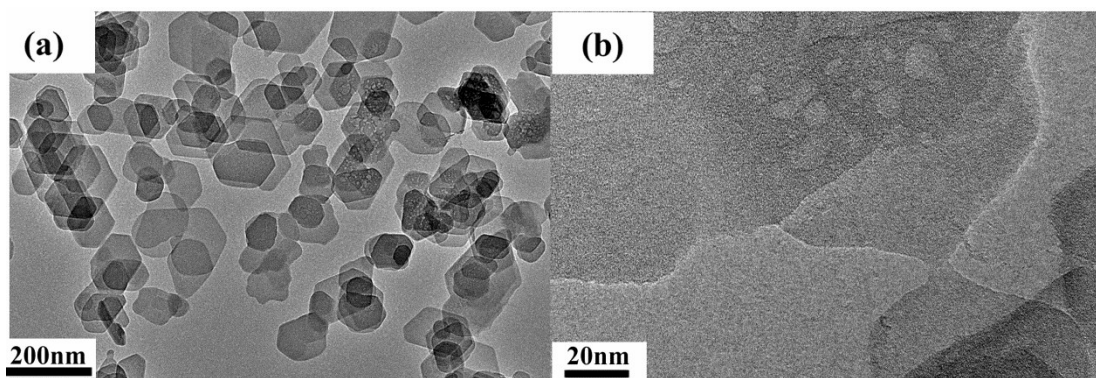

Fig. S2 TEM images of  $\text{Ti}(\text{HPO}_4)_2 \cdot \text{H}_2\text{O}$ .

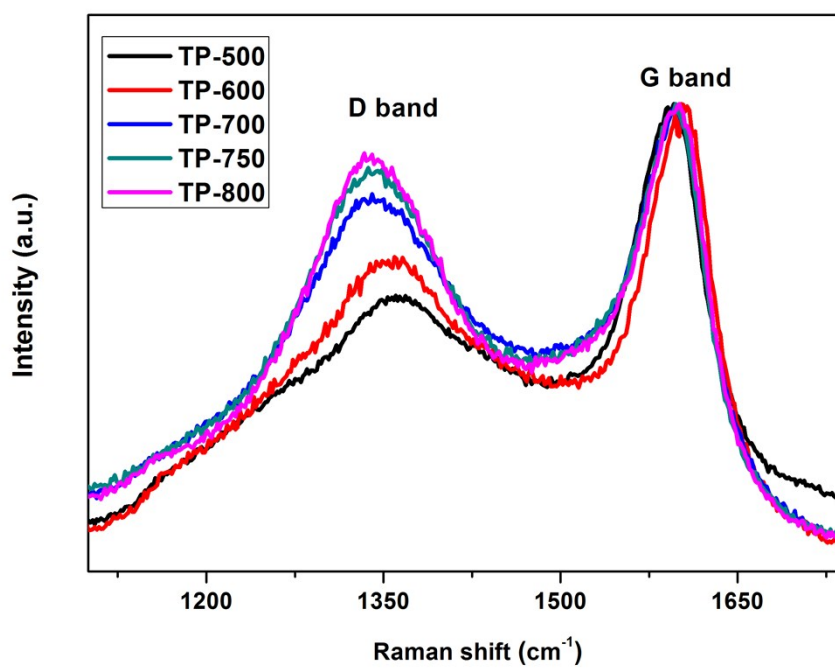

Fig. S3 Raman spectra of  $\text{TiP}_2\text{O}_7$  treated at different temperatures: TP-500, TP-600, TP-700, TP-750 and TP-800.

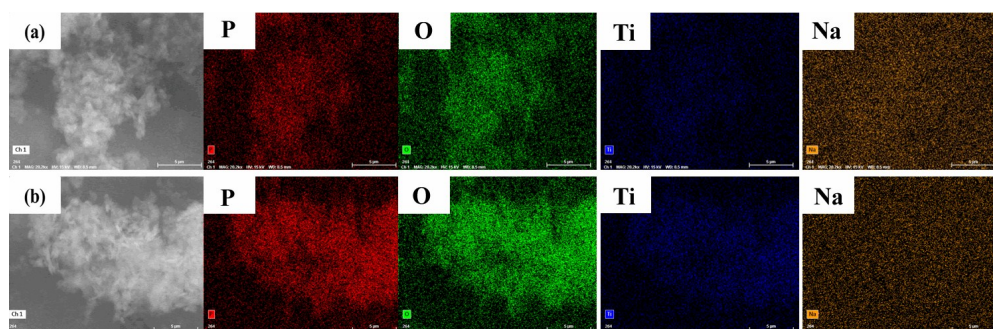

Fig. S4 Ex-situ EDS mapping of TP-600 (a) and TP-800 (b) at the first full discharge state for Na-alkali metal batteries.
